# Supplementary material
Source: Springer Nature journal article supplement (https://www.springermedizin.de/resource/supplementary/12884_2013_963_MOESM2_ESM.pdf/9459256)

## a) Character of Pain at Q2

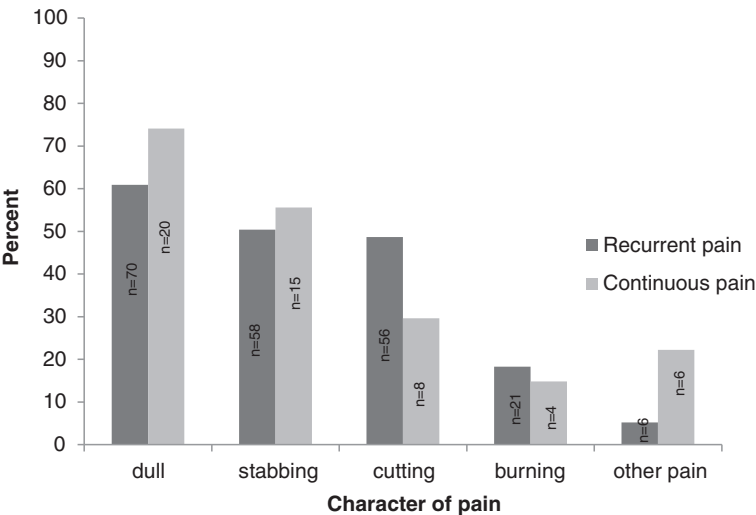

## b) Character of Pain at Q3

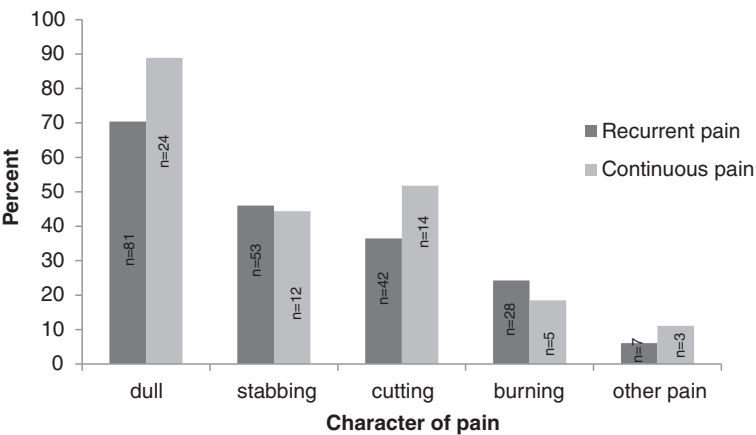

Supplement: MOESM2 [file 9459256]
